# Supplementary material
Source: PubMed Central journal article supplement (PMC5989684)
Supplement: CJN.11401017SupplementaryData.pdf [file CJN.11401017SupplementaryData.pdf]

**Supplementary Figure 1. Rhythm analysis parameters**

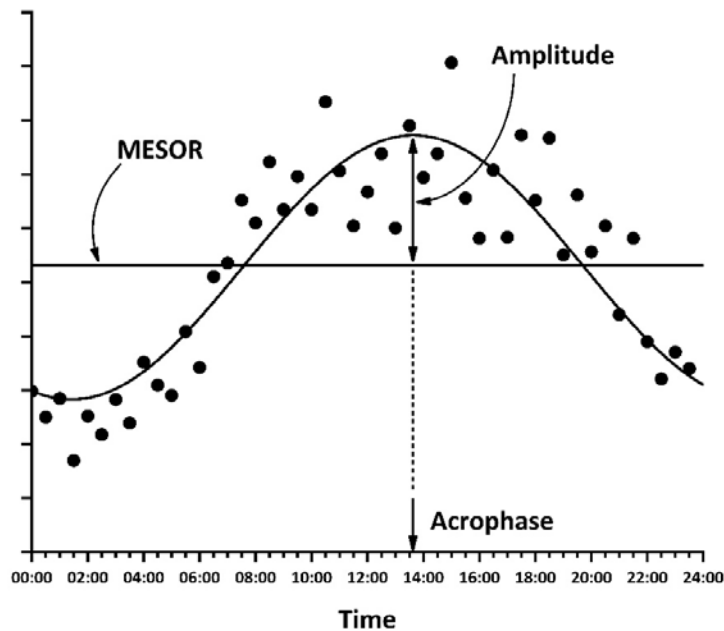

Several biological activities are characterized by rhythmic variations that are under the control of specialized suprachiasmatic nuclei and are influenced by external stimuli such as seasons, temperature, daylight, or feeding, resulting in ultradian (<24h), circadian (24h) and infradian (>24h) rhythmicity<sup>40</sup>. Periodic activities, such as sleep/wake cycles, or therapies, such as treatment with BP medications, also generate biological rhythms.

The figure illustrates an example of cosine function fitting on data points obtained by ABPM on a full day/night cycle. Partial Fourier analysis is used to fit the function. For circadian (24h) rhythms, the analysis is applied to the recorded BP or HR values. Ultradian rhythms (12h, 8h, 6h) correspond to rhythms that are superimposed on the circadian rhythm. The Fourier analysis is performed on the residual values between the observed data points and the circadian function. ABPM files are considered to contain rhythms if cosine functions can be fitted with a p value <0.05 by least-squares method analysis. In addition, the software calculates the *MESOR* (Midline Estimating Statistic of Rhythm) value, which corresponds to the mean value of the fitted curve, the rhythm *amplitude*, which corresponds to the distance between the MESOR and the curve's peak value, and the *acrophase*, which is the hour past midnight that corresponds to the peak value.

**Supplementary Figure 2.** Age distribution of patients included in the study

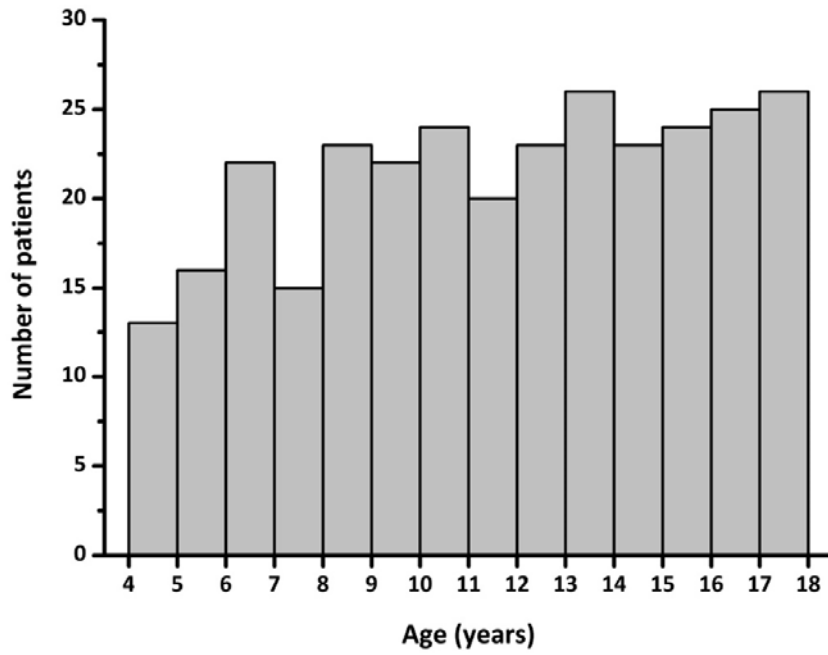

**Supplementary Figure 3. Right and left kidney length.**

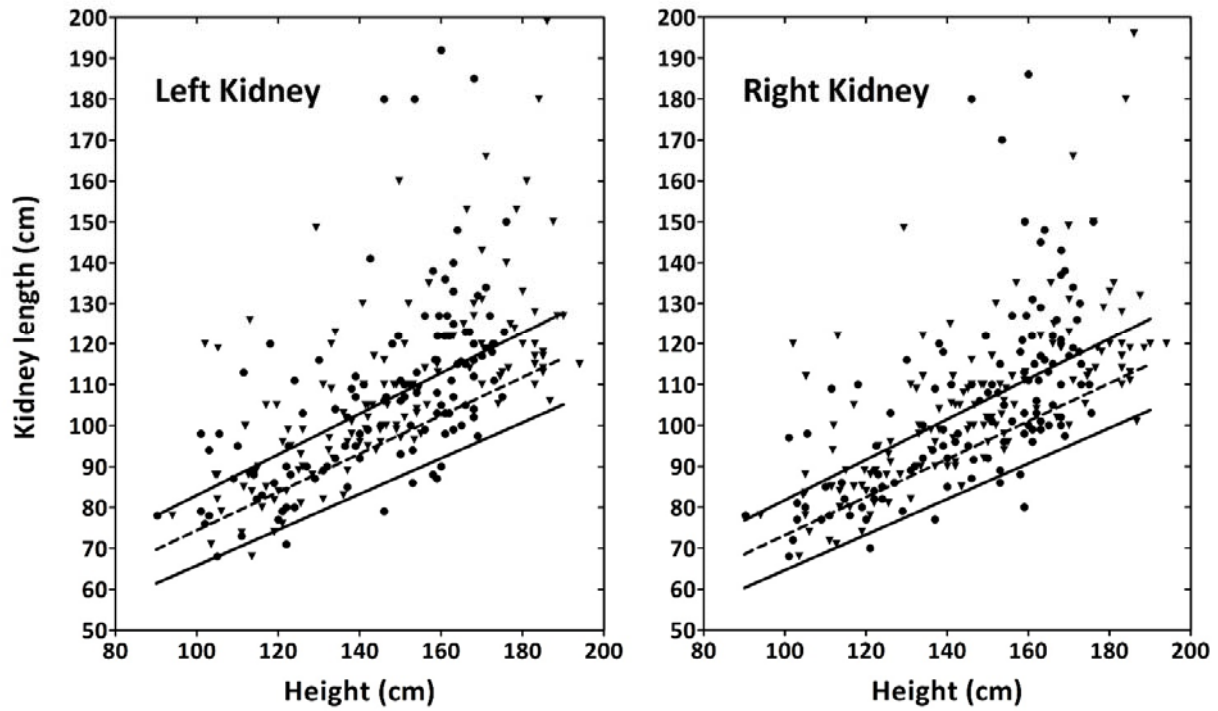

Boys are indicated with filled inverted triangles; girls with filled circles. Reference data (mean, -2SD and +2SD) are derived from: Di Zazzo, G, Stringini, G, Matteucci, MC, Muraca, M, Malena, S, Emma, F: Serum creatinine levels are significantly influenced by renal size in the normal pediatric population. *Clin J Am Soc Nephrol*, 6: 107-113, 2011.

**Supplementary Figure 4. Daytime and nighttime mean ABPM values**

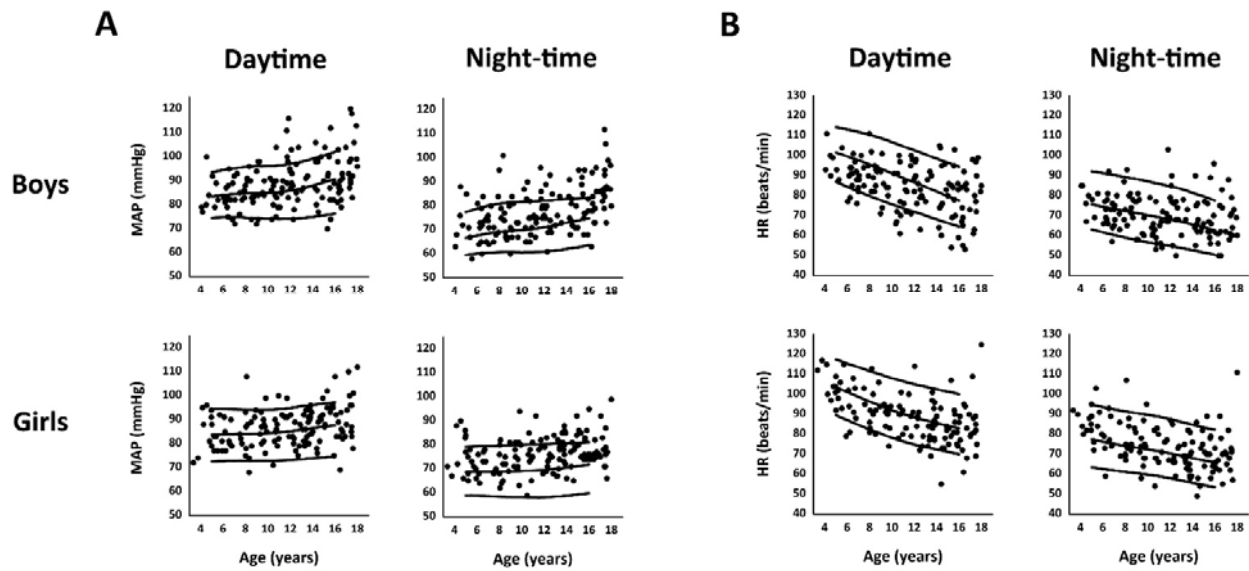

Panels A and B show mean values for mean arterial pressure (MAP) and heart rate (HR) in daytime and nighttime. Continuous lines show the reference ranges (5th, 50th, and 95th percentiles) for age as described in reference: Wuhl, E, Witte, K, Soergel, M, Mehls, O, Schaefer, F, German Working Group on Pediatric, H: Distribution of 24-h ambulatory blood pressure in children: normalized reference values and role of body dimensions. *J Hypertens*, 20: 1995-2007, 2002.

**Supplementary Table 1. Analysis of center effect**

|           | Adjusted OR | 95% C.I.    | p     |
|-----------|-------------|-------------|-------|
| Center 1  | 2,07        | 0,49 - 8,77 | 0,324 |
| Center 3  | 0,73        | 0,20 - 2,62 | 0,630 |
| Center 4  | 1,65        | 0,32 - 8,62 | 0,550 |
| Center 7  | 0,33        | 0,04 - 2,78 | 0,306 |
| Center 8  | 1,03        | 0,19 - 5,50 | 0,970 |
| Center 9  | 0,90        | 0,18 - 4,47 | 0,894 |
| Center 10 | 1,56        | 0,48 - 5,11 | 0,461 |
| Center 11 | 0,26        | 0,06 - 1,11 | 0,069 |
| Center 12 | 0,40        | 0,08 - 1,90 | 0,250 |
| Center 13 | 1,85        | 0,70 - 4,90 | 0,218 |
| Center 14 | 1,06        | 0,22 - 5,16 | 0,942 |
| Center 15 | 0,56        | 0,16 - 1,99 | 0,374 |
| Center 17 | 4,32        | 0,80 - 23,4 | 0,089 |
| Center 19 | 0,31        | 0,04 - 2,40 | 0,259 |
| Center 20 | 2,46        | 0,71 - 8,54 | 0,158 |
| Center 21 | 8,77        | 2,41 - 32,0 | 0,001 |
| Center 22 | 1,77        | 0,52 - 6,01 | 0,359 |

The table shows the results of a univariate logistic regression analysis, testing the effect of each center on the risk of having hypertension. Odds ratios (OR) were adjusted for age and gender. Data could not be calculated for 5 centers due to the limited number of patients.

**Supplementary Table 2. Logistic regression – effect of birth weight and renal function**

**24h hypertension**

| Variable     | Units                          | Adj. OR | 95% C.I.    | P    |
|--------------|--------------------------------|---------|-------------|------|
| Birth weight | 1000 gr                        | 0.70    | 0.22 - 2.20 | 0.54 |
| eGFR         | 100 ml/min/1.73 m <sup>2</sup> | 0.80    | 0.25 - 2.58 | 0.71 |

**Daytime hypertension**

| Variable     | Units                          | Adj. OR | 95% C.I.    | P    |
|--------------|--------------------------------|---------|-------------|------|
| Birth weight | 1000 gr                        | 0.37    | 0.11 - 1.26 | 0.11 |
| eGFR         | 100 ml/min/1.73 m <sup>2</sup> | 1.59    | 0.36 - 6.90 | 0.54 |

**Nighttime hypertension**

| Variable     | Units                          | Adj. OR | 95% C.I.    | P    |
|--------------|--------------------------------|---------|-------------|------|
| Birth weight | 1000 gr                        | 1.05    | 0.40 - 2.77 | 0.92 |
| eGFR         | 100 ml/min/1.73 m <sup>2</sup> | 0.86    | 0.29 - 2.56 | 0.79 |

**Isolated nocturnal hypertension**

| Variable     | Units                          | Adj. OR | 95% C.I.    | P    |
|--------------|--------------------------------|---------|-------------|------|
| Birth weight | 1000 gr                        | 2.35    | 0.74 - 7.51 | 0.15 |
| eGFR         | 100 ml/min/1.73 m <sup>2</sup> | 0.78    | 0.25 - 2.46 | 0.67 |

**Non-dipping**

| Variable     | Units                          | Adj. OR | 95% C.I.    | P    |
|--------------|--------------------------------|---------|-------------|------|
| Birth weight | 1000 gr                        | 2.03    | 0.95 - 4.31 | 0.07 |
| eGFR         | 100 ml/min/1.73 m <sup>2</sup> | 0.64    | 0.25 - 1.62 | 0.35 |

The table shows the results of a univariable logistic regression to analyze the impact of birth weight and eGFR on different ABPM outcomes. Odds ratios are adjusted (Adj. OR) for age, gender, use of BP medications and center effect, and are indicated with their corresponding 95% confidence intervals (95% C.I.).

Abbreviations: eGFR = estimated glomerular filtration rate

**Supplementary Table 3. Cardiovascular rhythm analysis.**

*A. Comparison of MAP rhythm amplitudes and acrophases with reference control subjects.*

|                      | Controls |     | ADPKD  |     | Trend | p      |
|----------------------|----------|-----|--------|-----|-------|--------|
|                      | Median   | IQR | Median | IQR |       |        |
| <b>MAP amplitude</b> |          |     |        |     |       |        |
| 24h                  | 10.1     | 4.4 | 7.7    | 4.2 | ↓     | <0.001 |
| 12h                  | 5.9      | 2.4 | 5.0    | 3.5 | ↓     | <0.001 |
| 8h                   | 5.5      | 2.6 | 3.7    | 1.8 | ↓     | <0.001 |
| 6h                   | 5.2      | 2.2 | 3.6    | 1.6 | ↓     | <0.001 |
| <b>MAP acrophase</b> |          |     |        |     |       |        |
| 24h                  | 13.9     | 1.9 | 14.6   | 2.4 | ↑     | <0.001 |
| 12h                  | 8        | 1.9 | 8.9    | 2.1 | ↑     | <0.001 |
| 8h                   | 2.1      | 1.8 | 2.7    | 2.4 | ↑     | 0.002  |
| 6h                   | 2        | 1.5 | 2.4    | 2.3 | ↑     | 0.045  |

*B. Comparison of HR rhythm amplitudes and acrophases with reference control subjects.*

|                     | Controls |     | ADPKD  |     | Trend | p      |
|---------------------|----------|-----|--------|-----|-------|--------|
|                     | Median   | IQR | Median | IQR |       |        |
| <b>HR amplitude</b> |          |     |        |     |       |        |
| 24h                 | 13.4     | 6.9 | 10.4   | 5.7 | ↓     | <0.001 |
| 12h                 | 7.7      | 4.0 | 5.9    | 3.7 | ↓     | <0.001 |
| 8h                  | 6.8      | 3.5 | 5.3    | 2.2 | ↓     | <0.001 |
| 6h                  | 6.4      | 2.7 | 4.2    | 2.2 | ↓     | <0.001 |
| <b>HR acrophase</b> |          |     |        |     |       |        |
| 24h                 | 13.5     | 2.0 | 14.1   | 2.4 | ↑     | <0.001 |
| 12h                 | 8.4      | 2.0 | 8.7    | 2.1 | ↑     | <0.04  |
| 8h                  | 1.8      | 2.8 | 2.4    | 2.6 | ↑     | <0.11  |
| 6h                  | 2.0      | 1.4 | 2.6    | 2.1 | ↑     | <0.04  |

*C.  $\chi^2$  test for association of MAP and HR ultradian rhythms.*

|                                                   | MAP<br>12h | MAP<br>8h | MAP<br>6h | HR<br>12h | HR<br>8h | HR<br>6h |
|---------------------------------------------------|------------|-----------|-----------|-----------|----------|----------|
| <b>Age<sup>1</sup></b>                            | 0.07       | 0.58      | 0.61      | 0.27      | 0.58     | 0.36     |
| <b>Hypertension<br/>and or BP<br/>medications</b> | 0.53       | 0.77      | 0.99      | 0.77      | 0.65     | 0.22     |
| <b>Non-dipping</b>                                | 0.13       | 0.41      | 0.92      | 0.04*     | 0.40     | 0.14     |

Reference values for control subjects in panels A and B are from: Hadtstein, C, Wuhl, E, Soergel, M, Witte, K, Schaefer, F, German Study Group for Pediatric, H: Normative values for circadian and ultradian cardiovascular rhythms in childhood. *Hypertension*, 43: 547-554, 2004.

Panel C shows the p values for each  $\chi^2$  test assessing the association between ultradian rhythms and age,

*Supplemental material is neither peer-reviewed nor thoroughly edited by CJASN. The authors alone are responsible for the accuracy and presentation of the material*

the presence of hypertension and/or the use of blood pressure medications, or the absence of nocturnal dipping.

(<sup>1</sup>) The population was divided in three age classes (<10 years, 10-13 years and >13 years), corresponding approximately to the terciles boundaries of the cohort.

(\*)  $p < 0.05$ .

*Abbreviations:* MAP: mean arterial pressure; HR = heart rate; IQR: inter-quartile range.



**Supplementary Table 4. Sensitivity analysis – ABPM results**

|                                            | All patients<br>(N=292) | All patients except patients<br>from center 21 (N=275) |       |
|--------------------------------------------|-------------------------|--------------------------------------------------------|-------|
|                                            | Prevalence              | Prevalence                                             | p     |
| Day - Hypertension                         | 14,9%                   | 10,9%                                                  | 0,163 |
| Night - Hypertension                       | 29,9%                   | 26,1%                                                  | 0,323 |
| 24h - Hypertension                         | 20,7%                   | 17,0%                                                  | 0,279 |
| Non Dippers                                | 51,9%                   | 51,5%                                                  | 0,927 |
| Isolated Nocturnal Hypertension            | 18,2%                   | 18,7%                                                  | 0,903 |
| Day - Hypertension and/or BP medications   | 31,3%                   | 27,1%                                                  | 0,294 |
| Night - Hypertension and/or BP medications | 41,6%                   | 37,7%                                                  | 0,363 |
| 24h - Hypertension and/or BP medications   | 34,8%                   | 30,9%                                                  | 0,338 |
| Day - BP <p75 without BP medications       | 51,6%                   | 54,7%                                                  | 0,486 |
| Night - BP <p75 without BP medications     | 34,7%                   | 37,0%                                                  | 0,582 |
| 24h - BP <p75 without BP medications       | 46,4%                   | 49,0%                                                  | 0,539 |

The table shows in columns 2 the prevalence of ABPM diagnoses as reported in table 1.

In the following columns, the same numbers have been calculated after removing seventeen patients from center 21, in which the prevalence of hypertension was significantly higher compared to the rest of the cohort. The impact of removing patients from center 21 was evaluated by the p value of  $\chi^2$  tests and was found to be statistically non-significant.

**Supplementary Table 5. Sensitivity analysis – Rhythm analysis**

|                                | All patients<br>(N=137) | Only patient not taking BP<br>medications (N=111) |          |
|--------------------------------|-------------------------|---------------------------------------------------|----------|
|                                | Prevalence              | Prevalence                                        | <i>P</i> |
| MAP – prepubertal - 24h rhythm | 90,3%                   | 90,6%                                             | 0.999    |
| MAP – prepubertal - 12h rhythm | 69,4%                   | 71,7%                                             | 0.623    |
| MAP – prepubertal - 8h rhythm  | 58,1%                   | 56,6%                                             | 0.877    |
| MAP – prepubertal - 6h rhythm  | 51,6%                   | 52,8%                                             | 0.901    |
| MAP – pubertal - 24h rhythm    | 88,0%                   | 86,2%                                             | 0.759    |
| MAP – pubertal - 12h rhythm    | 78,7%                   | 77,6%                                             | 0.884    |
| MAP – pubertal - 8h rhythm     | 53,3%                   | 50,0%                                             | 0.703    |
| MAP – pubertal - 6h rhythm     | 46,7%                   | 46,6%                                             | 0.999    |
| HR – prepubertal - 24h rhythm  | 95,2%                   | 94,3%                                             | 0.844    |
| HR – prepubertal - 12h rhythm  | 75,8%                   | 77,4%                                             | 0.846    |
| HR – prepubertal - 8h rhythm   | 58,1%                   | 60,4%                                             | 0.802    |
| HR – prepubertal - 6h rhythm   | 51,6%                   | 52,8%                                             | 0.901    |
| HR – pubertal - 24h rhythm     | 92,0%                   | 89,7%                                             | 0.634    |
| HR – pubertal - 12h rhythm     | 82,7%                   | 81,0%                                             | 0.809    |
| HR – pubertal - 8h rhythm      | 49,3%                   | 44,8%                                             | 0.606    |
| HR – pubertal - 6h rhythm      | 49,3%                   | 55,2%                                             | 0.504    |

The table shows the prevalence of circadian and ultradian rhythms in the entire cohort and after removing patients treated with blood pressure medications. The *P* value refer to the significance of  $\chi^2$  tests comparing the prevalence in the entire cohort with the prevalence after removing patients under blood pressure treatment.
